# Supplementary material for: An ultralight porous carbon scaffold for anode-free lithium metal batteries
Source: Royal Society of Chemistry journal article supplement (doi:10.1039/d4ta07925f), 2025-01-01
Supplement: d4ta07925f1.pdf [file d4ta07925f1.pdf]

## Supporting Information

Ultralight porous carbon scaffold for anode-free lithium metal batteries

*Rizwan Ur Rehman Sagar, Akhil Nelson, Muhammad Waseem Fazal, Nasir Mahmood,  
Muhammad Waqas Khan, Md Mokhlesur Rahman, and Ying (Ian) Chen\**

### Growth Mechanism

C-grapes are grown on a surface using methane ( $\text{CH}_4$ ) gas as a carbon source. The growth process is monitored at different stages by varying the duration of  $\text{CH}_4$  exposure. In the first step, after 15 minutes of  $\text{CH}_4$  flow, carbon atoms form a micron-sized thin carbon film on the surface (as shown in Fig. S1a). In the second step, after 25 minutes of  $\text{CH}_4$  exposure, these carbon clusters begin to agglomerate, leading to the nucleation of C-grapes (Fig. S1b). In the third step, after 30 minutes of  $\text{CH}_4$  exposure, the carbon clusters further develop into vertically hanging nano-sized grapes (Fig. S1c). The diameter of the C-grapes is influenced by both the temperature and the duration of  $\text{CH}_4$  exposure. Despite these variations, the growth conditions are kept consistent to produce similar materials suitable for use as anodes in anode-free batteries (Fig. S1d).

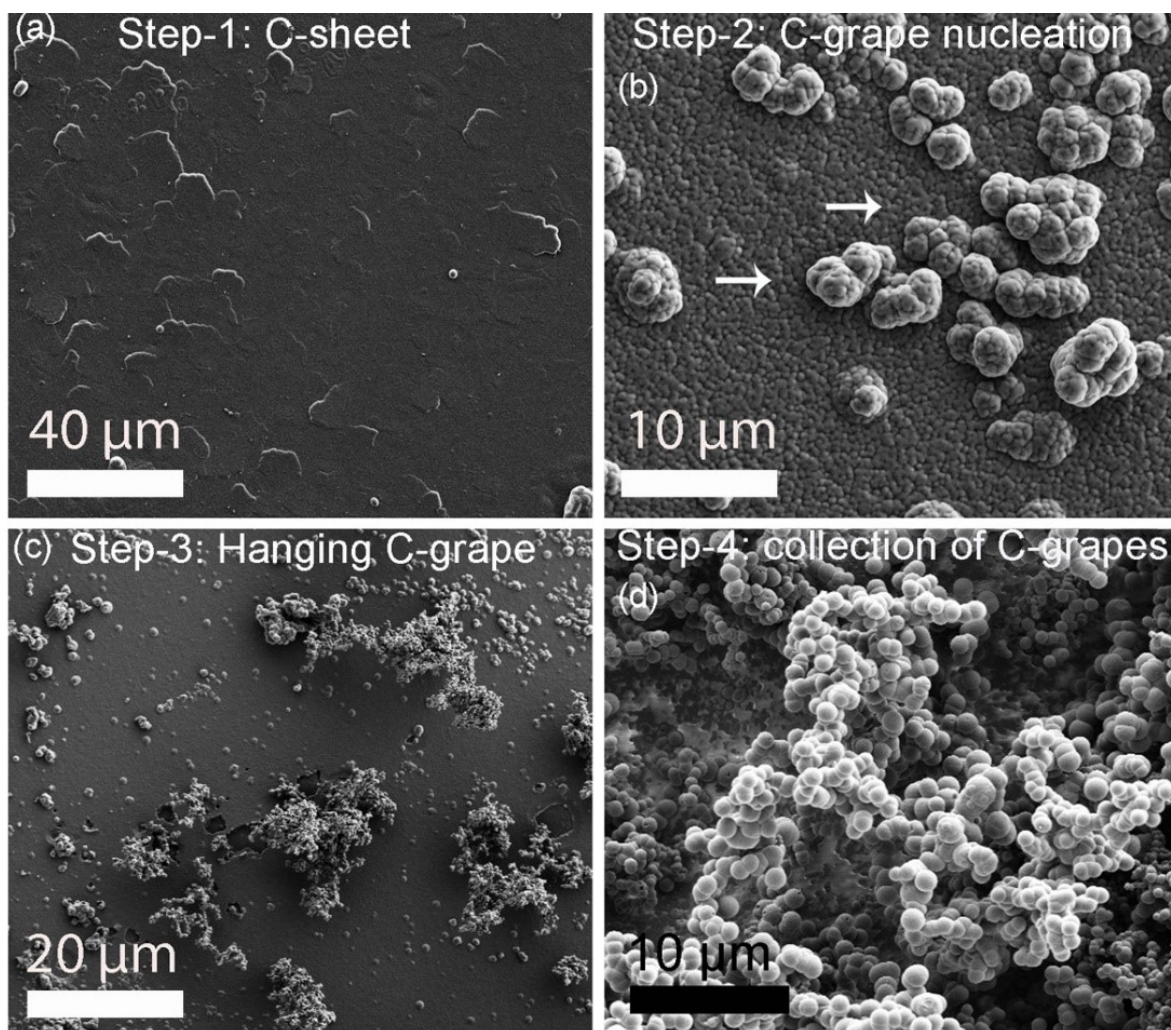

**Figure S1.** SEM image of the growth mechanism of C-grapes in CVD (a) C-thin film formation (b) nucleation of C-grapes started (c) hanging grapes can be seen (d) collected C-grapes in gram scale.

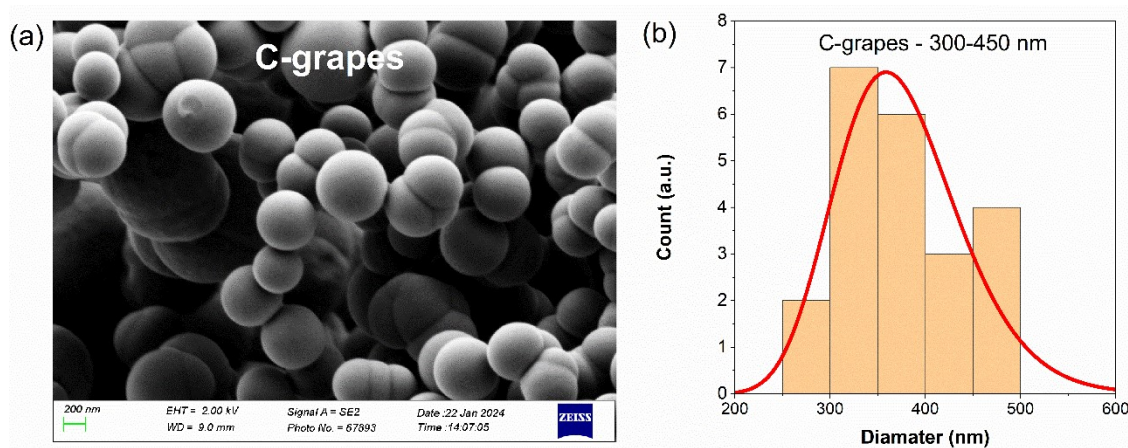

**Figure S2.** SEM of the C-grapes (a) and corresponding diameter distribution of C-grapes (b).

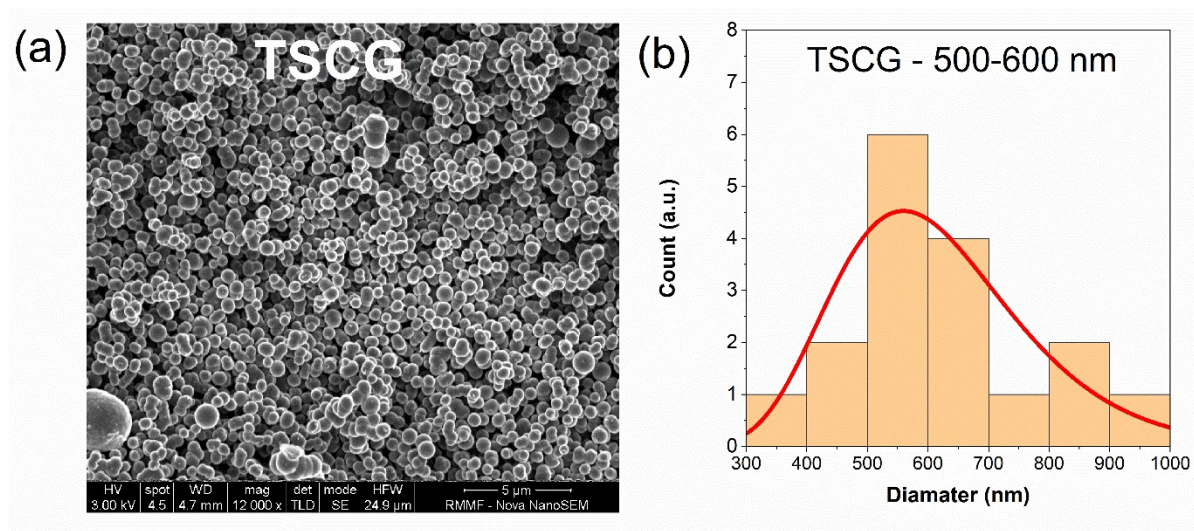

**Figure S3.** SEM of the TSCG (a) and corresponding diameter distribution of TSCG (b).

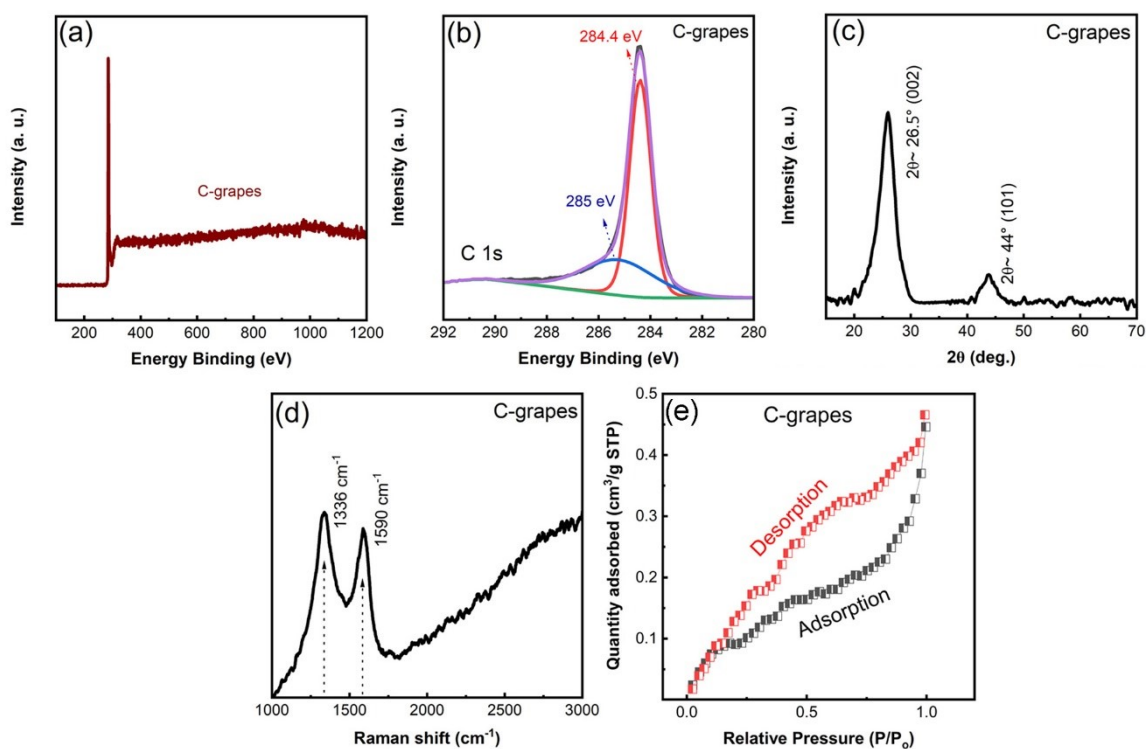

**Figure S4.** XPS survey conducted under a range of binding energy  $\sim 100$ - $1200$  eV (a) and C 1s spectra fitted with  $sp^3$  and  $sp^2$  hybridized carbon in C-grapes (b). XRD (c) and Raman (d) of C-grapes conducted at  $2\theta = 10$ - $70^\circ$  and  $636$  nm wavelength of laser light, respectively. The adsorption/desorption hysteresis of C-grapes indicates its porosity (e).



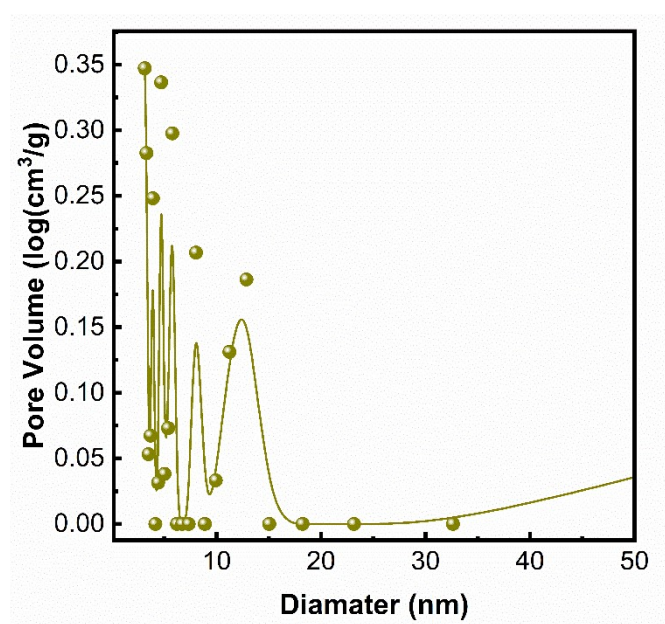

**Figure S5.** Pore volume vs. pore diameter of C-grapes curve

Full cell battery works fine to light LED as shown in Figure S6a-b, indicating formation of successful full cell battery.

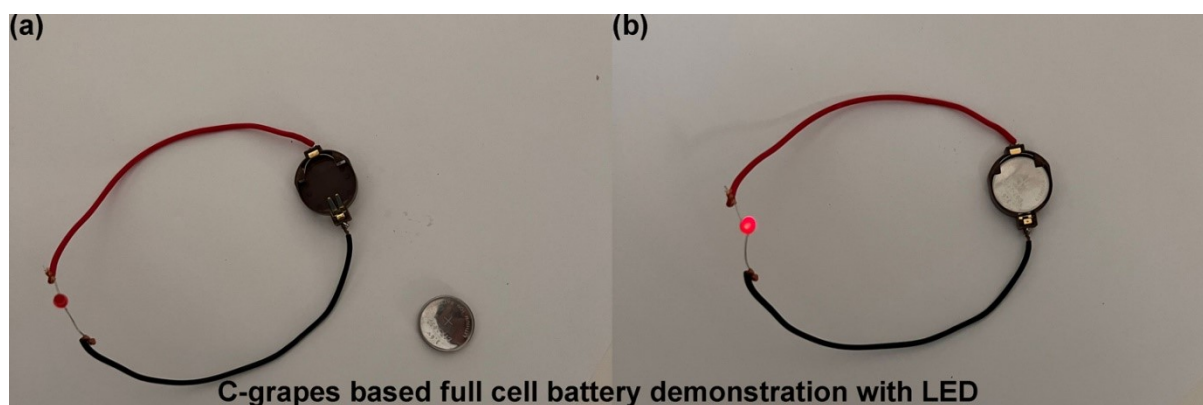

**Figure S6.** Schematic of full cell battery working without (a) and with LED (b).
